# Supplementary material for: Exploring the association between short/long preceding birth intervals and child mortality: using reference birth interval children of the same mother as comparison
Source: PubMed Central journal article supplement (PMC3847658; doi:10.1186/1471-2458-13-s3-s6), 2013-09-17
Supplement: 1471-2458-13-S3-S6-S1.pdf [file 1471-2458-13-S3-S6-S1.pdf]

Kozuki N and Walker N. Exploring the association between short/long preceding birth intervals and child mortality: using reference birth interval children of the same mother as comparison.

**Supplemental Table 1a: Sample sizes and odds ratios for short birth intervals, with under-5 mortality as outcome (reference birth interval: 24-<60 months)**

| country           | <18 months                                 |      |               |               | <24 months                                 |      |               |               |
|-------------------|--------------------------------------------|------|---------------|---------------|--------------------------------------------|------|---------------|---------------|
|                   | number of mothers contributing to analysis | OR   | 95% CI: Lower | 95% CI: Upper | number of mothers contributing to analysis | OR   | 95% CI: Lower | 95% CI: Upper |
| <b>Africa</b>     |                                            |      |               |               |                                            |      |               |               |
| Benin             | 848                                        | 1.45 | 1.19          | 1.77          | 2017                                       | 1.39 | 1.23          | 1.59          |
| Burkina Faso      | 987                                        | 1.15 | 0.95          | 1.39          | 2122                                       | 1.2  | 1.06          | 1.36          |
| Cameroon          | 709                                        | 1.34 | 1.02          | 1.75          | 1406                                       | 1.22 | 1.02          | 1.45          |
| Chad              | 525                                        | 1.7  | 1.33          | 2.17          | 1133                                       | 1.45 | 1.22          | 1.71          |
| Congo-Brazzaville | 278                                        | 1.35 | 0.82          | 2.21          | 600                                        | 1.38 | 1.01          | 1.87          |
| DRC               | 675                                        | 1.74 | 1.34          | 2.56          | 1345                                       | 1.49 | 1.27          | 1.74          |
| Ethiopia          | 1195                                       | 1.83 | 1.54          | 2.17          | 2000                                       | 1.56 | 1.37          | 1.79          |
| Ghana             | 237                                        | 2.06 | 1.34          | 3.18          | 536                                        | 1.65 | 1.23          | 2.23          |
| Guinea            | 562                                        | 0.84 | 0.66          | 1.05          | 1320                                       | 0.79 | 0.69          | 0.91          |
| Guyana            | 369                                        | 2.75 | 1.39          | 5.44          | 595                                        | 2.04 | 1.14          | 3.65          |
| Kenya             | 615                                        | 1.84 | 1.26          | 2.67          | 1091                                       | 1.57 | 1.18          | 2.09          |
| Lesotho           | 191                                        | 1.49 | 0.85          | 2.59          | 422                                        | 1.27 | 0.85          | 1.9           |
| Liberia           | 563                                        | 1.19 | 0.91          | 1.56          | 1049                                       | 1.36 | 1.14          | 1.62          |
| Madagascar        | 1341                                       | 1.66 | 1.39          | 2.00          | 2380                                       | 1.52 | 1.31          | 1.75          |
| Malawi            | 3006                                       | 1.76 | 1.44          | 2.14          | 1368                                       | 1.64 | 1.44          | 1.87          |
| Mali              | 1389                                       | 1.46 | 1.19          | 1.78          | 2745                                       | 1.34 | 1.2           | 1.50          |
| Mozambique        | 734                                        | 1.54 | 1.25          | 1.88          | 1653                                       | 1.27 | 1.10          | 1.46          |
| Namibia           | 387                                        | 2.45 | 1.58          | 3.80          | 732                                        | 1.87 | 1.39          | 2.51          |
| Niger             | 999                                        | 1.79 | 1.46          | 2.18          | 1784                                       | 1.41 | 1.23          | 1.61          |
| Nigeria           | 2777                                       | 1.48 | 1.34          | 1.63          | 5408                                       | 1.31 | 1.22          | 1.41          |
| Rwanda            | 955                                        | 1.42 | 1.17          | 1.71          | 1767                                       | 1.39 | 1.22          | 1.59          |
| Senegal           | 1045                                       | 1.60 | 1.31          | 1.97          | 2058                                       | 1.45 | 1.26          | 1.66          |
| Sierra Leone      | 419                                        | 1.58 | 1.18          | 2.12          | 880                                        | 1.22 | 1.03          | 1.45          |
| Swaziland         | 273                                        | 1.64 | 1.02          | 2.65          | 554                                        | 1.59 | 1.13          | 2.24          |
| Tanzania          | 631                                        | 1.71 | 1.32          | 2.22          | 1379                                       | 1.66 | 1.39          | 1.97          |
| Uganda            | 784                                        | 1.55 | 1.27          | 1.90          | 1481                                       | 1.52 | 1.31          | 1.77          |
| Zambia            | 428                                        | 1.93 | 1.44          | 2.58          | 857                                        | 1.66 | 1.35          | 2.06          |
| Zimbabwe          | 309                                        | 1.47 | 0.77          | 2.82          | 331                                        | 1.6  | 0.98          | 2.62          |
| <b>Asia</b>       |                                            |      |               |               |                                            |      |               |               |
| Bangladesh        | 651                                        | 1.25 | 0.95          | 1.65          | 1382                                       | 1.36 | 1.13          | 1.65          |
| Cambodia          | 1219                                       | 1.53 | 1.22          | 1.94          | 2305                                       | 1.44 | 1.20          | 1.71          |
| India             | 7673                                       | 2.05 | 1.88          | 2.23          | 14132                                      | 1.73 | 1.62          | 1.84          |
| Indonesia         | 2130                                       | 1.18 | 0.95          | 1.47          | 3711                                       | 1.21 | 1.00          | 1.46          |
| Maldives          | 928                                        | 1.66 | 1.24          | 2.23          | 1425                                       | 1.45 | 1.15          | 1.84          |

Kozuki N and Walker N. Exploring the association between short/long preceding birth intervals and child mortality: using reference birth interval children of the same mother as comparison.

|                    |      |      |      |      |      |      |      |      |
|--------------------|------|------|------|------|------|------|------|------|
| Nepal              | 807  | 1.92 | 1.46 | 2.53 | 1570 | 1.66 | 1.36 | 2.04 |
| Pakistan           | 1794 | 2.14 | 1.76 | 2.61 | 2568 | 1.80 | 1.53 | 2.13 |
| Philippines        | 1056 | 2.10 | 1.59 | 2.77 | 1750 | 1.54 | 1.23 | 1.93 |
| <b>Americas</b>    |      |      |      |      |      |      |      |      |
| Bolivia            | 1348 | 2.13 | 1.76 | 2.57 | 2310 | 1.86 | 1.61 | 2.15 |
| Colombia           | 2461 | 1.98 | 1.51 | 2.61 | 4099 | 1.55 | 1.25 | 1.94 |
| Dominican Republic | 2222 | 1.81 | 1.32 | 2.50 | 3368 | 1.57 | 1.21 | 2.04 |
| Haiti              | 839  | 1.60 | 1.30 | 1.98 | 1496 | 1.54 | 1.30 | 1.82 |
| Honduras           | 1652 | 1.97 | 1.58 | 2.47 | 2756 | 1.83 | 1.52 | 2.19 |
| <b>Other</b>       |      |      |      |      |      |      |      |      |
| Albania            | 318  | 2.05 | 1.13 | 3.70 | 681  | 1.62 | 1.02 | 2.57 |
| Armenia            | 382  | 1.35 | 0.75 | 2.43 | 588  | 1.20 | 0.78 | 1.86 |
| Azerbaijan         | 649  | 1.64 | 1.05 | 2.56 | 973  | 1.58 | 1.07 | 2.34 |
| Egypt              | 1935 | 3.43 | 2.81 | 4.20 | 3010 | 2.55 | 2.17 | 3.01 |
| Jordan             | 2330 | 1.88 | 1.19 | 2.97 | 3228 | 1.46 | 0.96 | 2.20 |
| Moldova            | 150  | 1.13 | 0.54 | 2.36 | 293  | 1.01 | 0.60 | 1.68 |

Kozuki N and Walker N. Exploring the association between short/long preceding birth intervals and child mortality: using reference birth interval children of the same mother as comparison.

**Supplemental Table 1b: Sample sizes and odds ratios relative risk for long birth intervals, with under-5 mortality as outcome (reference birth interval: 24-<60 months)**

| country           | ≥60 months                                 |      |               |               | ≥72 months                                 |      |               |               |
|-------------------|--------------------------------------------|------|---------------|---------------|--------------------------------------------|------|---------------|---------------|
|                   | Number of mothers contributing to analysis | OR   | 95% CI: Lower | 95% CI: Upper | Number of mothers contributing to analysis | OR   | 95% CI: Lower | 95% CI: Upper |
| <b>Africa</b>     |                                            |      |               |               |                                            |      |               |               |
| Benin             | 722                                        | 0.68 | 0.49          | 0.93          | 351                                        | 0.75 | 0.46          | 1.21          |
| Burkina Faso      | 683                                        | 0.48 | 0.34          | 0.69          | 328                                        | 0.37 | 0.22          | 0.63          |
| Cameroon          | 445                                        | 0.38 | 0.22          | 0.65          | 328                                        | 0.46 | 0.22          | 0.95          |
| Chad              | 262                                        | 0.26 | 0.13          | 0.52          | 139                                        | 0.22 | 0.08          | 0.60          |
| Congo-Brazzaville | 465                                        | 0.94 | 0.58          | 1.53          | 281                                        | 0.82 | 0.42          | 1.62          |
| DRC               | 511                                        | 0.59 | 0.36          | 0.97          | 286                                        | 0.88 | 0.43          | 1.80          |
| Ethiopia          | 783                                        | 0.43 | 0.29          | 0.63          | 421                                        | 0.29 | 0.16          | 0.53          |
| Ghana             | 372                                        | 0.60 | 0.33          | 1.08          | 220                                        | 0.69 | 0.31          | 1.53          |
| Guinea            | 557                                        | 0.26 | 0.17          | 0.41          | 309                                        | 0.31 | 0.17          | 0.56          |
| Guyana            | 327                                        | 0.93 | 0.40          | 2.16          | 206                                        | 0.50 | 0.17          | 1.51          |
| Kenya             | 472                                        | 0.89 | 0.50          | 1.58          | 257                                        | 1.42 | 0.62          | 3.25          |
| Lesotho           | 450                                        | 1.50 | 0.80          | 2.80          | 258                                        | 1.55 | 0.71          | 3.43          |
| Liberia           | 597                                        | 0.70 | 0.48          | 1.00          | 374                                        | 0.56 | 0.33          | 0.95          |
| Madagascar        | 932                                        | 0.50 | 0.32          | 0.78          | 545                                        | 0.87 | 0.50          | 1.52          |
| Malawi            | 246                                        | 0.5  | 0.37          | 0.67          | 742                                        | 0.54 | 0.36          | 0.79          |
| Mali              | 676                                        | 0.29 | 0.19          | 0.44          | 360                                        | 0.25 | 0.14          | 0.44          |
| Mozambique        | 684                                        | 0.45 | 0.28          | 0.73          | 394                                        | 0.54 | 0.28          | 1.03          |
| Namibia           | 656                                        | 1.80 | 1.05          | 3.10          | 372                                        | 1.87 | 0.92          | 3.82          |
| Niger             | 524                                        | 0.60 | 0.41          | 0.89          | 264                                        | 0.71 | 0.39          | 1.30          |
| Nigeria           | 1812                                       | 0.40 | 0.33          | 0.50          | 1047                                       | 0.42 | 0.31          | 0.56          |
| Rwanda            | 379                                        | 0.73 | 0.47          | 1.12          | 174                                        | 0.44 | 0.22          | 0.90          |
| Senegal           | 737                                        | 0.61 | 0.37          | 1.02          | 418                                        | 0.80 | 0.39          | 1.65          |
| Sierra Leone      | 497                                        | 0.36 | 0.23          | 0.56          | 312                                        | 0.25 | 0.14          | 0.44          |
| Swaziland         | 342                                        | 0.50 | 0.23          | 1.10          | 205                                        | 0.42 | 0.14          | 1.26          |
| Tanzania          | 625                                        | 0.68 | 0.4           | 1.16          | 332                                        | 0.48 | 0.23          | 0.99          |
| Uganda            | 422                                        | 0.41 | 0.26          | 0.64          | 223                                        | 0.42 | 0.23          | 0.79          |
| Zambia            | 366                                        | 0.30 | 0.18          | 0.52          | 191                                        | 0.23 | 0.11          | 0.48          |
| Zimbabwe          | 605                                        | 1.00 | 0.56          | 1.76          | 331                                        | 1.75 | 0.90          | 3.42          |
| <b>Asia</b>       |                                            |      |               |               |                                            |      |               |               |
| Bangladesh        | 980                                        | 0.56 | 0.40          | 0.80          | 585                                        | 0.44 | 0.27          | 0.71          |
| Cambodia          | 910                                        | 0.79 | 0.53          | 1.17          | 486                                        | 0.87 | 0.53          | 1.43          |
| India             | 4054                                       | 0.37 | 0.30          | 0.46          | 2044                                       | 0.35 | 0.26          | 0.46          |
| Indonesia         | 2873                                       | 0.63 | 0.44          | 0.90          | 1825                                       | 0.56 | 0.34          | 0.93          |
| Maldives          | 692                                        | 0.55 | 0.30          | 0.99          | 400                                        | 0.54 | 0.25          | 1.17          |

Kozuki N and Walker N. Exploring the association between short/long preceding birth intervals and child mortality: using reference birth interval children of the same mother as comparison.

|                    |      |      |      |      |      |      |      |       |
|--------------------|------|------|------|------|------|------|------|-------|
| Nepal              | 415  | 0.36 | 0.17 | 0.74 | 184  | 0.41 | 0.14 | 1.23  |
| Pakistan           | 534  | 0.88 | 0.51 | 1.52 | 266  | 0.79 | 0.36 | 1.74  |
| Philippines        | 548  | 1.04 | 0.54 | 1.99 | 281  | 0.86 | 0.34 | 2.16  |
| <b>Americas</b>    |      |      |      |      |      |      |      |       |
| Bolivia            | 929  | 0.50 | 0.33 | 0.77 | 561  | 0.49 | 0.27 | 0.89  |
| Colombia           | 2710 | 1.06 | 0.72 | 1.58 | 1711 | 0.96 | 0.57 | 1.59  |
| Dominican Republic | 1249 | 0.85 | 0.50 | 1.44 | 739  | 0.99 | 0.49 | 2.01  |
| Haiti              | 350  | 0.37 | 0.16 | 0.83 | 196  | 0.46 | 0.15 | 1.38  |
| Honduras           | 937  | 0.69 | 0.41 | 1.18 | 509  | 0.68 | 0.35 | 1.33  |
| <b>Other</b>       |      |      |      |      |      |      |      |       |
| Albania            | 347  | 0.73 | 0.23 | 2.33 | 148  | 0.05 | 0.01 | 0.39  |
| Armenia            | 207  | 1.45 | 0.52 | 4.03 | 123  | 2.25 | 0.50 | 10.14 |
| Azerbaijan         | 143  | 1.34 | 0.40 | 4.55 | 63   | 0.89 | 0.11 | 6.99  |
| Egypt              | 1239 | 0.73 | 0.44 | 1.21 | 628  | 0.67 | 0.31 | 1.44  |
| Jordan             | 522  | 0.67 | 0.20 | 2.27 | 228  | 1.08 | 0.16 | 7.20  |
| Moldova            | 234  | 1.55 | 0.45 | 5.30 | 131  | 1.98 | 0.27 | 14.35 |

Kozuki N and Walker N. Exploring the association between short/long preceding birth intervals and child mortality: using reference birth interval children of the same mother as comparison.

**Supplemental Table 2a: Sample sizes and odds ratios for short birth intervals, with neonatal mortality as outcome (reference birth interval: 24-<60 months)**

| country           | <18 months                                 |         |               |               | <24 months                                 |         |               |               |
|-------------------|--------------------------------------------|---------|---------------|---------------|--------------------------------------------|---------|---------------|---------------|
|                   | Number of mothers contributing to analysis | Adj. OR | 95% CI: Lower | 95% CI: Upper | Number of mothers contributing to analysis | Adj. OR | 95% CI: Lower | 95% CI: Upper |
| <b>Africa</b>     |                                            |         |               |               |                                            |         |               |               |
| Benin             | 885                                        | 1.45    | 1.05          | 2.01          | 2089                                       | 1.43    | 1.14          | 1.80          |
| Burkina Faso      | 1013                                       | 1.83    | 1.29          | 2.60          | 2175                                       | 1.65    | 1.31          | 2.07          |
| Cameroon          | 728                                        | 1.93    | 1.26          | 2.95          | 1437                                       | 1.46    | 1.05          | 2.03          |
| Chad              | 548                                        | 2.06    | 1.38          | 3.08          | 1165                                       | 1.58    | 1.18          | 2.12          |
| Congo-Brazzaville | 293                                        | 1.43    | 0.83          | 2.47          | 623                                        | 1.34    | 0.95          | 1.88          |
| DRC               | 714                                        | 0.99    | 0.40          | 2.49          | 1402                                       | 1.02    | 0.61          | 1.71          |
| Ethiopia          | 1233                                       | 1.64    | 1.19          | 2.25          | 2066                                       | 1.42    | 1.10          | 1.84          |
| Ghana             | 247                                        | 2.49    | 1.38          | 4.50          | 558                                        | 2.06    | 1.35          | 3.14          |
| Guinea            | 585                                        | 1.23    | 0.87          | 1.73          | 1364                                       | 1.12    | 0.90          | 1.41          |
| Guyana            | 376                                        | 2.36    | 0.84          | 6.64          | 610                                        | 2.01    | 0.86          | 4.70          |
| Kenya             | 641                                        | 1.91    | 1.15          | 3.17          | 1127                                       | 1.43    | 0.92          | 2.25          |
| Lesotho           | 195                                        | 1.25    | 0.62          | 2.52          | 433                                        | 1.53    | 0.95          | 2.47          |
| Liberia           | 590                                        | 1.89    | 1.19          | 2.99          | 1085                                       | 1.98    | 1.38          | 2.84          |
| Madagascar        | 1392                                       | 1.98    | 1.36          | 2.86          | 2462                                       | 1.61    | 1.20          | 2.16          |
| Malawi            | 1519                                       | 1.58    | 1.12          | 2.22          | 3106                                       | 1.64    | 1.27          | 2.13          |
| Mali              | 1452                                       | 1.86    | 1.46          | 2.38          | 2828                                       | 1.72    | 1.43          | 2.07          |
| Mozambique        | 751                                        | 1.65    | 1.11          | 2.44          | 1701                                       | 1.72    | 1.29          | 2.29          |
| Namibia           | 401                                        | 3.78    | 1.75          | 8.18          | 752                                        | 2.82    | 1.66          | 4.79          |
| Niger             | 1027                                       | 1.90    | 1.36          | 2.65          | 1838                                       | 1.55    | 1.20          | 2.01          |
| Nigeria           | 2917                                       | 1.85    | 1.55          | 2.2           | 5666                                       | 1.49    | 1.31          | 1.70          |
| Rwanda            | 999                                        | 1.52    | 1.11          | 2.08          | 1844                                       | 1.78    | 1.38          | 2.31          |
| Senegal           | 1082                                       | 2.00    | 1.48          | 2.72          | 2123                                       | 1.55    | 1.22          | 1.98          |
| Sierra Leone      | 445                                        | 1.61    | 0.96          | 2.68          | 945                                        | 1.39    | 0.96          | 2.01          |
| Swaziland         | 280                                        | 2.11    | 0.76          | 5.90          | 568                                        | 1.44    | 0.74          | 2.80          |
| Tanzania          | 647                                        | 1.27    | 0.80          | 2.01          | 1420                                       | 1.38    | 0.95          | 2.00          |
| Uganda            | 820                                        | 1.65    | 1.16          | 2.34          | 1516                                       | 1.64    | 1.23          | 2.17          |
| Zambia            | 442                                        | 2.33    | 1.42          | 3.81          | 883                                        | 1.72    | 1.18          | 2.52          |
| Zimbabwe          | 315                                        | 1.04    | 0.51          | 2.14          | 706                                        | 1.88    | 0.88          | 3.99          |
| <b>Asia</b>       |                                            |         |               |               |                                            |         |               |               |
| Bangladesh        | 666                                        | 1.32    | 0.90          | 1.93          | 1406                                       | 1.44    | 1.11          | 1.87          |
| Cambodia          | 1238                                       | 2.28    | 1.59          | 3.28          | 2338                                       | 1.80    | 1.36          | 2.39          |
| India             | 7800                                       | 1.97    | 1.74          | 2.23          | 14325                                      | 1.76    | 1.60          | 1.93          |
| Indonesia         | 2210                                       | 1.30    | 0.92          | 1.82          | 3846                                       | 1.45    | 1.06          | 1.97          |
| Maldives          | 939                                        | 2.26    | 1.49          | 3.44          | 1444                                       | 1.66    | 1.19          | 2.32          |

Kozuki N and Walker N. Exploring the association between short/long preceding birth intervals and child mortality: using reference birth interval children of the same mother as comparison.

|                    |      |      |      |      |      |      |      |      |
|--------------------|------|------|------|------|------|------|------|------|
| Nepal              | 821  | 1.56 | 1.08 | 2.25 | 1587 | 1.54 | 1.20 | 1.98 |
| Pakistan           | 1866 | 1.66 | 1.27 | 2.16 | 2658 | 1.41 | 1.13 | 1.75 |
| Philippines        | 1103 | 2.64 | 1.58 | 4.42 | 1816 | 1.76 | 1.16 | 2.66 |
| <b>Americas</b>    |      |      |      |      |      |      |      |      |
| Bolivia            | 1360 | 2.09 | 1.54 | 2.84 | 2348 | 2.03 | 1.58 | 2.61 |
| Colombia           | 2499 | 2.19 | 1.39 | 3.46 | 4161 | 1.70 | 1.21 | 2.38 |
| Dominican Republic | 2259 | 2.04 | 1.25 | 3.33 | 3421 | 1.26 | 0.81 | 1.95 |
| Haiti              | 867  | 1.88 | 1.13 | 3.12 | 1537 | 1.72 | 1.23 | 2.41 |
| Honduras           | 1672 | 2.42 | 1.71 | 3.44 | 2790 | 2.08 | 1.55 | 2.8  |
| <b>Other</b>       |      |      |      |      |      |      |      |      |
| Albania            | 319  | 1.76 | 0.51 | 6.07 | 691  | 1.07 | 0.43 | 2.63 |
| Armenia            | 383  | 0.98 | 0.43 | 2.25 | 590  | 0.92 | 0.44 | 1.92 |
| Azerbaijan         | 655  | 1.34 | 0.65 | 2.78 | 981  | 1.33 | 0.71 | 2.5  |
| Egypt              | 163  | 3.91 | 2.77 | 5.51 | 78   | 3.01 | 2.29 | 3.96 |
| Jordan             | 1969 | 1.99 | 1.06 | 3.73 | 3070 | 1.33 | 0.74 | 2.37 |
| Moldova            | 152  | 1.04 | 0.35 | 3.12 | 297  | 0.69 | 0.28 | 1.67 |

Kozuki N and Walker N. Exploring the association between short/long preceding birth intervals and child mortality: using reference birth interval children of the same mother as comparison.

**Supplemental Table 2b: Sample sizes and odds ratios relative risk for long birth intervals, with neonatal mortality as outcome (reference birth interval: 24-<60 months)**

| country           | ≥60 months                                 |      |               |               | ≥72 months                                 |       |               |               |
|-------------------|--------------------------------------------|------|---------------|---------------|--------------------------------------------|-------|---------------|---------------|
|                   | Number of mothers contributing to analysis | OR   | 95% CI: Lower | 95% CI: Upper | Number of mothers contributing to analysis | OR    | 95% CI: Lower | 95% CI: Upper |
| <b>Africa</b>     |                                            |      |               |               |                                            |       |               |               |
| Benin             | 845                                        | 0.80 | 0.49          | 1.31          | 423                                        | 0.71  | 0.36          | 1.40          |
| Burkina Faso      | 783                                        | 0.52 | 0.23          | 1.14          | 388                                        | 0.41  | 0.12          | 1.38          |
| Cameroon          | 510                                        | 0.62 | 0.26          | 1.45          | 296                                        | 0.74  | 0.27          | 2.02          |
| Chad              | 304                                        | 0.34 | 0.11          | 1.11          | 161                                        | 0.42  | 0.07          | 2.53          |
| Congo-Brazzaville | 545                                        | 0.56 | 0.20          | 1.53          | 338                                        | 0.93  | 0.25          | 3.44          |
| DRC               | 568                                        | 0.64 | 0.24          | 1.70          | 321                                        | 1.56  | 0.45          | 5.46          |
| Ethiopia          | 874                                        | 0.48 | 0.25          | 0.92          | 483                                        | 0.50  | 0.19          | 1.32          |
| Ghana             | 433                                        | 0.97 | 0.41          | 2.28          | 263                                        | 1.56  | 0.47          | 5.16          |
| Guinea            | 649                                        | 0.27 | 0.11          | 0.66          | 365                                        | 0.42  | 0.14          | 1.25          |
| Guyana            | 359                                        | 0.89 | 0.24          | 3.24          | 231                                        | 0.40  | 0.06          | 2.48          |
| Kenya             | 531                                        | 2.45 | 0.97          | 6.18          | 296                                        | 4.52  | 1.28          | 16.01         |
| Lesotho           | 510                                        | 3.04 | 1.24          | 7.48          | 303                                        | 3.74  | 1.12          | 12.47         |
| Liberia           | 677                                        | 0.52 | 0.22          | 1.23          | 432                                        | 0.38  | 0.12          | 1.23          |
| Madagascar        | 1079                                       | 0.81 | 0.36          | 1.81          | 648                                        | 0.68  | 0.26          | 1.77          |
| Malawi            | 1592                                       | 0.72 | 0.42          | 1.24          | 876                                        | 1.10  | 0.56          | 2.15          |
| Mali              | 797                                        | 0.60 | 0.29          | 1.25          | 429                                        | 0.39  | 0.10          | 1.58          |
| Mozambique        | 781                                        | 0.52 | 0.17          | 1.57          | 459                                        | 0.52  | 0.11          | 2.50          |
| Namibia           | 739                                        | 4.55 | 1.76          | 11.79         | 442                                        | 13.49 | 2.45          | 74.36         |
| Niger             | 620                                        | 2.02 | 0.80          | 5.14          | 319                                        | 1.91  | 0.45          | 8.11          |
| Nigeria           | 2090                                       | 0.65 | 0.44          | 0.95          | 1213                                       | 0.92  | 0.57          | 1.46          |
| Rwanda            | 445                                        | 0.51 | 0.21          | 1.25          | 215                                        | 0.33  | 0.09          | 1.17          |
| Senegal           | 849                                        | 0.85 | 0.33          | 2.18          | 489                                        | 1.13  | 0.28          | 4.53          |
| Sierra Leone      | 599                                        | 0.29 | 0.13          | 0.66          | 389                                        | 0.15  | 0.05          | 0.50          |
| Swaziland         | 393                                        | 0.19 | 0.02          | 1.51          | 244                                        | 0.25  | 0.01          | 4.47          |
| Tanzania          | 720                                        | 0.77 | 0.35          | 1.72          | 400                                        | 0.88  | 0.34          | 2.32          |
| Uganda            | 475                                        | 0.52 | 0.25          | 1.09          | 262                                        | 0.74  | 0.27          | 2.04          |
| Zambia            | 426                                        | 0.56 | 0.22          | 1.45          | 222                                        | 0.57  | 0.15          | 2.07          |
| Zimbabwe          | 672                                        | 1.24 | 0.47          | 3.26          | 385                                        | 1.90  | 0.58          | 6.20          |
| <b>Asia</b>       |                                            |      |               |               |                                            |       |               |               |
| Bangladesh        | 1053                                       | 0.66 | 0.42          | 1.04          | 641                                        | 0.50  | 0.25          | 1.01          |
| Cambodia          | 1049                                       | 0.85 | 0.46          | 1.60          | 594                                        | 1.03  | 0.48          | 2.22          |
| India             | 4415                                       | 0.48 | 0.36          | 0.64          | 2777                                       | 0.52  | 0.35          | .75           |
| Indonesia         | 3304                                       | 1.08 | 0.67          | 1.74          | 2149                                       | 0.89  | 0.48          | 1.66          |
| Maldives          | 792                                        | 0.93 | 0.45          | 1.94          | 486                                        | 1.17  | 0.47          | 2.93          |

Kozuki N and Walker N. Exploring the association between short/long preceding birth intervals and child mortality: using reference birth interval children of the same mother as comparison.

|                    |      |       |      |        |      |      |      |       |
|--------------------|------|-------|------|--------|------|------|------|-------|
| Nepal              | 461  | 0.60  | 0.23 | 1.56   | 214  | 0.65 | 0.19 | 2.28  |
| Pakistan           | 604  | 0.83  | 0.41 | 1.71   | 305  | 0.54 | 0.21 | 1.43  |
| Philippines        | 638  | 1.97  | 0.90 | 4.31   | 351  | 2.45 | 0.77 | 7.77  |
| <b>Americas</b>    |      |       |      |        |      |      |      |       |
| Bolivia            | 1058 | 0.61  | 0.27 | 1.34   | 661  | 0.60 | 0.20 | 1.79  |
| Colombia           | 2932 | 1.24  | 0.73 | 2.11   | 1899 | 1.35 | 0.67 | 2.71  |
| Dominican Republic | 1388 | 0.67  | 0.32 | 1.41   | 854  | 0.70 | 0.29 | 1.71  |
| Haiti              | 450  | 0.25  | 0.08 | 0.79   | 262  | 0.21 | 0.05 | 0.86  |
| Honduras           | 1045 | 1.32  | 0.55 | 3.20   | 591  | 3.36 | 1.00 | 11.30 |
| <b>Other</b>       |      |       |      |        |      |      |      |       |
| Albania            | 319  | 0.39  | 0.06 | 2.69   | 691  | ---  | ---  | ---   |
| Armenia            | 383  | 10.51 | 1.63 | 67.73  | 590  | ---  | ---  | ---   |
| Azerbaijan         | 655  | 2.86  | 0.47 | 17.59  | 981  | 3.29 | 0.29 | 36.98 |
| Egypt              | 1969 | 1.29  | 0.65 | 2.55   | 3070 | 0.95 | 0.32 | 2.83  |
| Jordan             | 672  | 0.88  | 0.20 | 3.81   | 311  | 2.63 | 0.42 | 16.60 |
| Moldova            | 249  | 8.48  | 0.68 | 105.17 | 144  | 2.71 | 0.09 | 82.42 |



Kozuki N and Walker N. Exploring the association between short/long preceding birth intervals and child mortality: using reference birth interval children of the same mother as comparison.

**Supplemental Table 3: Mean and median percentage of women who have high completed fertility, defined as 5 or more live births (when limiting to women who were age 35 or over at time of DHS interview)**

|        | Africa | Asia   | Americas | North Africa/Central Asia/Europe |
|--------|--------|--------|----------|----------------------------------|
| Mean   | 80.28% | 59.71% | 55.58%   | 30.97%                           |
| Median | 85.95% | 58.88% | 67.94%   | 17.61%                           |

Kozuki N and Walker N. Exploring the association between short/long preceding birth intervals and child mortality: using reference birth interval children of the same mother as comparison.

**Supplemental Table 4: Summary of country-level average time of birth, by birth interval category**

| Birth interval                                                                                                              | <18 months | <24 months | 24-<60 months | ≥60 months | ≥72 months |
|-----------------------------------------------------------------------------------------------------------------------------|------------|------------|---------------|------------|------------|
| Difference in average calendar year that the births in each birth interval category occurred, averaged across all datasets* | 1.23       | 1.13       | ref           | 2.62       | 3.05       |
| Smallest country-level difference (yrs) in average calendar year that the births in each birth interval category occurred** | 0.04       | 0.1        | ref           | 1.31       | 1.55       |
| Largest country-level difference (yrs) in average calendar year that the births in each birth interval category occurred*** | 3.11       | 2.61       | ref           | 4.57       | 5.53       |

\*First, the average calendar year of birth was calculated for each birth interval category. Second, the difference in average calendar year was calculated between the exposure birth interval categories and the reference birth interval category. Third, that difference was then averaged across all 47 datasets to produce the number in the table.

\*\*This row reports data from the country that reported the smallest difference in the aforementioned second step.

\*\*\*This row reports data from the country that reported the largest difference in the aforementioned second step.

Kozuki N and Walker N. Exploring the association between short/long preceding birth intervals and child mortality: using reference birth interval children of the same mother as comparison.

**Supplemental Table 5: Summary of country-level average birth order, by birth interval category**

| Birth interval                                                   | <18 months | <24 months | 24-<60 months | ≥60 months | ≥72 months |
|------------------------------------------------------------------|------------|------------|---------------|------------|------------|
| Difference in average birth order, averaged across all datasets* | 0.32       | 0.22       | ref           | 0.43       | 0.53       |
| Smallest country-level difference in average birth order**       | 0          | 0.02       | ref           | 0.01       | 0.03       |
| Largest country-level difference in average birth order***       | 0.9        | 0.52       | ref           | 0.79       | 0.96       |

\*First, the average birth order was calculated for each birth interval category. Second, the difference in average birth order was calculated between the exposure birth interval categories and the reference birth interval category. Third, that difference was then averaged across all 47 datasets to produce the number in the table.

\*\*This row reports data from the country that reported the smallest difference in the aforementioned second step.

\*\*\*This row reports data from the country that reported the largest difference in the aforementioned second step.
